# Supplementary material
Source: PubMed Central journal article supplement (PMC1965559)

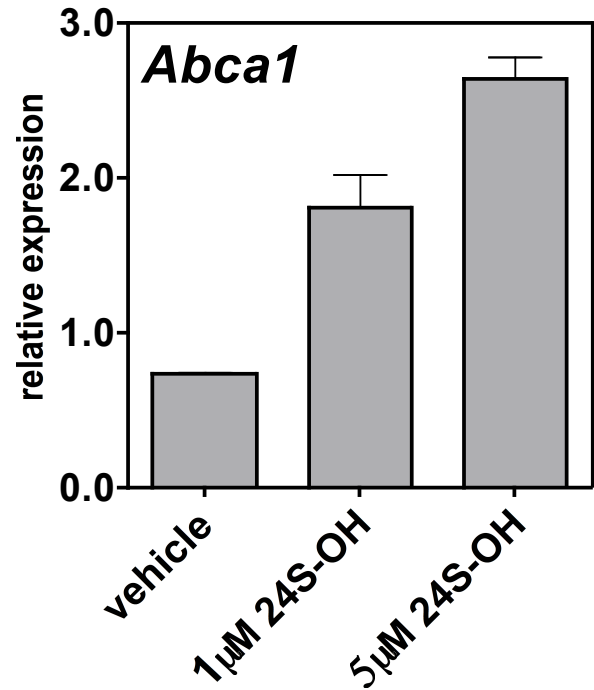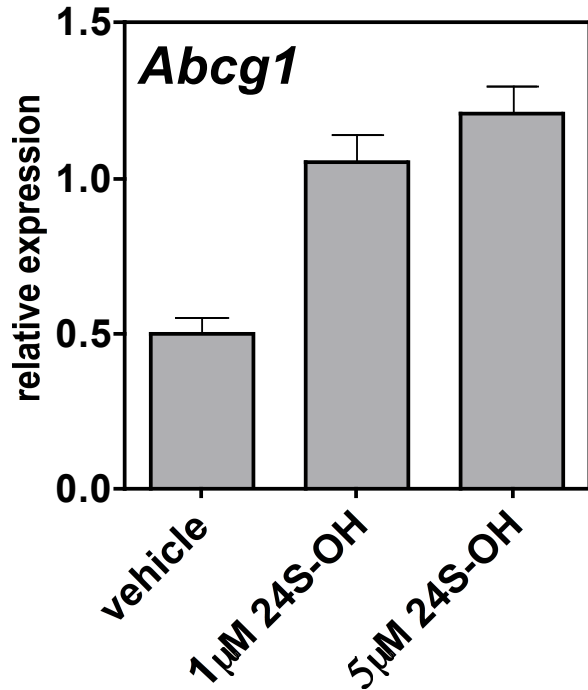

Supplement: pnas_0701096104_1.pdf [file pnas_0701096104_1.pdf]
